# Supplementary material
Source: PubMed Central journal article supplement (PMC10352588)
Supplement: JI_2300190_Supplemental_1.pdf [file JI_2300190_Supplemental_1.pdf]

**Supplemental Table I. Samples sizes used in multivariate analyses**

|                                 | T1: Pre   | T2: 2-4wks_PD1 | T3: 2-4wks_PD2 | T4: 3-4M_PD2 | T5: 2-4wks_PD3 | T6: 3-4M_PD3 | T7: 2-4wks_PD4 | T8: 3-4M_PD4 |
|---------------------------------|-----------|----------------|----------------|--------------|----------------|--------------|----------------|--------------|
| <b>IgG</b>                      |           |                |                |              |                |              |                |              |
| Healthy controls                | 15        | 17             | 21             | 11           | 5              | 6            |                |              |
| <b>IMID pooled</b>              | <b>94</b> | <b>112</b>     | <b>103</b>     | <b>84</b>    | <b>52</b>      | <b>41</b>    | <b>24</b>      | <b>19</b>    |
| <b>Non-TNF IMID</b>             | <b>42</b> | <b>59</b>      | <b>55</b>      | <b>51</b>    | <b>29</b>      | <b>26</b>    | <b>13</b>      | <b>11</b>    |
| Untreated                       | 9         | 9              | 9              | 9            | 5              | 6            | 0              | 0            |
| Anti-IL17A                      | 3         | 6              | 6              | 6            | 6              | 5            | 4              | 3            |
| MTX/AZA                         | 3         | 7              | 7              | 4            | 2              | 1            | 1              | 2            |
| Anti-IL12/23                    | 26        | 27             | 23             | 22           | 11             | 11           | 6              | 5            |
| Anti-IL23                       | 1         | 10             | 10             | 10           | 5              | 3            | 2              | 1            |
| <b>TNF IMID</b>                 | <b>52</b> | <b>53</b>      | <b>48</b>      | <b>33</b>    | <b>23</b>      | <b>15</b>    | <b>11</b>      | <b>8</b>     |
| Anti-TNF                        | 37        | 37             | 34             | 23           | 16             | 9            | 5              | 3            |
| Anti-TNF + MTZ/AZA              | 15        | 16             | 14             | 10           | 7              | 6            | 6              | 5            |
| <b>Neutralizing (Wild type)</b> |           |                |                |              |                |              |                |              |
| Healthy controls                |           |                | 21             | 9            | 5              | 6            |                |              |
| <b>IMID pooled</b>              |           |                | <b>103</b>     | <b>79</b>    | <b>43</b>      | <b>40</b>    | <b>16</b>      | <b>17</b>    |
| <b>Non-TNF IMID</b>             |           |                | <b>55</b>      | <b>48</b>    | <b>24</b>      | <b>25</b>    | <b>8</b>       | <b>11</b>    |
| Untreated                       |           |                | 9              | 9            | 5              | 5            | 0              | 0            |
| Anti-IL17A                      |           |                | 6              | 5            | 5              | 5            | 3              | 3            |
| MTX/AZA                         |           |                | 7              | 3            | 1              | 1            | 0              | 2            |
| Anti-IL12/23                    |           |                | 23             | 22           | 8              | 11           | 4              | 5            |
| Anti-IL23                       |           |                | 10             | 9            | 5              | 3            | 1              | 1            |
| <b>TNF IMID</b>                 |           |                | <b>48</b>      | <b>31</b>    | <b>19</b>      | <b>15</b>    | <b>8</b>       | <b>6</b>     |
| Anti-TNF                        |           |                | 34             | 22           | 14             | 9            | 4              | 2            |
| Anti-TNF + MTZ/AZA              |           |                | 14             | 9            | 5              | 6            | 4              | 4            |
| <b>T cell cytokines</b>         |           |                |                |              |                |              |                |              |
| Healthy controls                | 14        | 13             | 17             | 8            | 4              | 6            |                |              |
| <b>IMID pooled</b>              | <b>85</b> | <b>95</b>      | <b>96</b>      | <b>75</b>    | <b>49</b>      | <b>39</b>    | <b>25</b>      | <b>20</b>    |
| <b>Non-TNF IMID</b>             | <b>36</b> | <b>48</b>      | <b>50</b>      | <b>46</b>    | <b>27</b>      | <b>26</b>    | <b>14</b>      | <b>11</b>    |
| Untreated                       | 9         | 9              | 9              | 9            | 5              | 6            | 0              | 0            |
| Anti-IL17A                      | 3         | 5              | 4              | 5            | 6              | 5            | 4              | 3            |
| MTX/AZA                         | 3         | 5              | 6              | 3            | 1              | 1            | 1              | 2            |
| Anti-IL12/23                    | 20        | 20             | 22             | 21           | 10             | 11           | 7              | 5            |
| Anti-IL23                       | 1         | 9              | 9              | 8            | 5              | 3            | 2              | 1            |
| <b>TNF IMID</b>                 | <b>49</b> | <b>47</b>      | <b>46</b>      | <b>29</b>    | <b>22</b>      | <b>13</b>    | <b>11</b>      | <b>9</b>     |
| Anti-TNF                        | 36        | 33             | 32             | 20           | 14             | 7            | 5              | 4            |
| Anti-TNF + MTZ/AZA              | 13        | 14             | 14             | 9            | 8              | 6            | 6              | 5            |

Bolded values represent sums of the rows below (i.e., IMID pooled totals are the sum of Non-TNF IMID and TNF IMID totals).

Abbreviations: AZA: azathioprine; IL: Interleukin; IMID: Immune-Mediated Inflammatory Diseases; M: months; MTX: Methotrexate; PD: Post dose; TNF: Tumor necrosis factor; wks: weeks

**Supplemental Table II. Anti-spike and anti-RBD IgG levels and samples outside limits of detection**

|                           | Spike - log <sub>2</sub> (BAU/mL) |                    |                   | RBD - log <sub>2</sub> (BAU/mL) |                    |                   |
|---------------------------|-----------------------------------|--------------------|-------------------|---------------------------------|--------------------|-------------------|
|                           | Healthy controls                  | Non-TNF IMID       | Anti-TNF          | Healthy controls                | Non-TNF IMID       | Anti-TNF          |
| <b>T1: Pre - N</b>        | 15                                | 42                 | 52                | 15                              | 42                 | 52                |
| Median (IQR)              | 0.8 (-0.8 - 1.5)                  | 0.7 (0.3 - 1.3)    | 0.8 (0.4 - 1.6)   | 0.6 (0.6 - 0.6)                 | 0.6 (0.6 - 0.6)    | 0.6 (0.6 - 0.6)   |
| Upper limit - N (%)       | 0 (0.0)                           | 0 (0.0)            | 0 (0.0)           | 0 (0.0)                         | 0 (0.0)            | 0 (0.0)           |
| <b>T2: 2-4wks_PD1 - N</b> | 17                                | 59                 | 53                | 16                              | 58                 | 53                |
| Median (IQR)              | 8.3 (7.9 - 8.9)                   | 7.6 (6.5 - 8.8)    | 6.4 (5.4 - 7.2)   | 7.6 (7.0 - 8.3)                 | 7.2 (6.4 - 7.8)    | 6.1 (4.8 - 7.1)   |
| Upper limit - N (%)       | 0 (0.0)                           | 2 (3.4)            | 0 (0.0)           | 0 (0.0)                         | 0 (0.0)            | 0 (0.0)           |
| <b>T3: 2-4wks_PD2 - N</b> | 21                                | 55                 | 48                | 21                              | 55                 | 48                |
| Median (IQR)              | 10.6 (10.6 - 10.6)                | 10.6 (10.6 - 10.6) | 10.5 (9.2 - 10.6) | 11.7 (10.6 - 12.1)              | 12.0 (11.3 - 12.1) | 10.5 (9.1 - 11.9) |
| Upper limit - N (%)       | 17 (81.0)                         | 45 (81.8)          | 24 (50.0)         | 9 (42.9)                        | 25 (45.5)          | 10 (20.8)         |
| <b>T4: 3-4M_PD2 - N</b>   | 11                                | 51                 | 33                | 11                              | 51                 | 33                |
| Median (IQR)              | 9.7 (9.1 - 10.0)                  | 9.2 (7.9 - 9.7)    | 5.7 (5.4 - 7.3)   | 9.5 (9.2 - 10.5)                | 8.7 (7.5 - 10.1)   | 6.7 (5.1 - 7.2)   |
| Upper limit - N (%)       | 0 (0.0)                           | 2 (3.9)            | 0 (0.0)           | 0 (0.0)                         | 0 (0.0)            | 0 (0.0)           |
| <b>T5: 2-4wks_PD3 - N</b> | 5                                 | 29                 | 23                | 5                               | 29                 | 23                |
| Median (IQR)              | 10.6 (10.6 - 10.6)                | 10.6 (10.5 - 10.6) | 10.6 (9.2 - 10.6) | 11.6 (11.3 - 11.7)              | 11.2 (10.4 - 11.8) | 10.5 (8.4 - 11.5) |
| Upper limit - N (%)       | 5 (100.0)                         | 21 (72.4)          | 13 (56.5)         | 1 (20.0)                        | 4 (13.8)           | 2 (8.7)           |
| <b>T6: 3-4M_PD3 - N</b>   | 6                                 | 26                 | 15                | 6                               | 26                 | 14                |
| Median (IQR)              | 10.5 (9.9 - 10.6)                 | 9.6 (9.0 - 10.5)   | 8.1 (6.1 - 9.2)   | 10.0 (9.8 - 10.8)               | 9.3 (8.5 - 10.3)   | 8.1 (7.2 - 8.6)   |
| Upper limit - N (%)       | 3 (50.0)                          | 6 (23.1)           | 1 (6.7)           | 0 (0.0)                         | 1 (3.8)            | 0 (0.0)           |
| <b>T7: 2-4wks_PD4 - N</b> |                                   | 13                 | 11                |                                 | 13                 | 11                |
| Median (IQR)              |                                   | 10.6 (10.6 - 10.6) | 9.1 (8.2 - 10.6)  |                                 | 11.0 (10.7 - 11.7) | 9.0 (8.6 - 10.4)  |
| Upper limit - N (%)       |                                   | 11 (84.6)          | 3 (27.3)          |                                 | 2 (15.4)           | 1 (9.1)           |
| <b>T8: 3-4M_PD4 - N</b>   |                                   | 11                 | 8                 |                                 | 11                 | 8                 |
| Median (IQR)              |                                   | 9.8 (9.4 - 10.6)   | 8.6 (6.7 - 9.6)   |                                 | 9.1 (8.5 - 10.7)   | 7.7 (7.1 - 9.5)   |
| Upper limit - N (%)       |                                   | 4 (36.4)           | 1 (12.5)          |                                 | 0 (0.0)            | 0 (0.0)           |

Abbreviations: BAU/mL: Binding antibody units per milliliter; IMID: Immune-Mediated Inflammatory Diseases; IQR: Inter-quartile range; M: months; PD: Post dose; TNF: Tumor necrosis factor; wks: weeks

**Supplemental Table III. Neutralization titers and samples outside limits of detection**

|                           | Wild Type Neutralization - Log <sub>10</sub> (ID50) |                 |                 | Omicron BA.1 Neutralization - Log <sub>10</sub> (ID50) |                 |                 | Omicron BA.5 Neutralization - Log <sub>10</sub> (ID50) |                 |                 |
|---------------------------|-----------------------------------------------------|-----------------|-----------------|--------------------------------------------------------|-----------------|-----------------|--------------------------------------------------------|-----------------|-----------------|
|                           | Healthy controls                                    | Non-TNF IMID    | Anti-TNF        | Healthy controls                                       | Non-TNF IMID    | Anti-TNF        | Healthy controls                                       | Non-TNF IMID    | Anti-TNF        |
| <b>T3: 2-4wks_PD2 - N</b> | 21                                                  | 55              | 48              |                                                        |                 |                 |                                                        |                 |                 |
| Median (IQR)              | 3.6 (3.2 - 3.9)                                     | 3.5 (3.3 - 3.9) | 2.9 (2.4 - 3.4) |                                                        |                 |                 |                                                        |                 |                 |
| Upper limit – N (%)       | 0 (0.0)                                             | 0 (0.0)         | 0 (0.0)         |                                                        |                 |                 |                                                        |                 |                 |
| Lower limit – N (%)       | 0 (0.0)                                             | 0 (0.0)         | 1 (2.1)         |                                                        |                 |                 |                                                        |                 |                 |
| <b>T4: 3-4M_PD2 - N</b>   | 9                                                   | 48              | 31              | 9                                                      | 48              | 31              |                                                        |                 |                 |
| Median (IQR)              | 3.2 (3.0 - 3.2)                                     | 2.5 (2.2 - 2.8) | 1.6 (0.0 - 2.0) | 2.1 (1.3 - 2.2)                                        | 1.1 (0.0 - 1.7) | 0.0 (0.0 - 0.0) |                                                        |                 |                 |
| Upper limit – N (%)       | 0 (0.0)                                             | 0 (0.0)         | 0 (0.0)         | 0 (0.0)                                                | 0 (0.0)         | 0 (0.0)         |                                                        |                 |                 |
| Lower limit – N (%)       | 0 (0.0)                                             | 1 (2.1)         | 8 (25.8)        | 1 (11.1)                                               | 17 (35.4)       | 25 (80.6)       |                                                        |                 |                 |
| <b>T5: 2-4wks_PD3 - N</b> | 5                                                   | 24              | 19              | 5                                                      | 24              | 19              | 5                                                      | 24              | 19              |
| Median (IQR)              | 3.8 (3.6 - 3.9)                                     | 3.5 (3.3 - 3.6) | 3.6 (2.9 - 3.9) | 2.9 (2.8 - 3.3)                                        | 2.5 (2.3 - 2.7) | 2.5 (0.9 - 3.0) | 2.9 (2.6 - 3.1)                                        | 2.4 (2.2 - 2.6) | 2.2 (1.8 - 2.7) |
| Upper limit – N (%)       | 0 (0.0)                                             | 0 (0.0)         | 0 (0.0)         | 0 (0.0)                                                | 0 (0.0)         | 0 (0.0)         | 0 (0.0)                                                | 0 (0.0)         | 0 (0.0)         |
| Lower limit – N (%)       | 0 (0.0)                                             | 0 (0.0)         | 0 (0.0)         | 0 (0.0)                                                | 0 (0.0)         | 4 (21.1)        | 0 (0.0)                                                | 0 (0.0)         | 1 (5.3)         |
| <b>T6: 3-4M_PD3 - N</b>   | 6                                                   | 25              | 15              | 6                                                      | 25              | 15              | 6                                                      | 25              | 15              |
| Median (IQR)              | 3.7 (3.4 - 3.9)                                     | 3.1 (2.9 - 3.2) | 2.7 (2.2 - 3.1) | 2.6 (2.5 - 3.1)                                        | 2.0 (1.8 - 2.3) | 1.6 (0.0 - 1.8) | 2.3 (2.2 - 2.6)                                        | 1.8 (1.4 - 2.1) | 0.0 (0.0 - 1.6) |
| Upper limit – N (%)       | 0 (0.0)                                             | 0 (0.0)         | 0 (0.0)         | 0 (0.0)                                                | 0 (0.0)         | 0 (0.0)         | 0 (0.0)                                                | 0 (0.0)         | 0 (0.0)         |
| Lower limit – N (%)       | 0 (0.0)                                             | 0 (0.0)         | 0 (0.0)         | 0 (0.0)                                                | 0 (0.0)         | 5 (33.3)        | 0 (0.0)                                                | 3 (12.0)        | 8 (53.3)        |
| <b>T7: 2-4wks_PD4 - N</b> |                                                     | 8               | 8               |                                                        | 8               | 8               |                                                        | 8               | 8               |
| Median (IQR)              |                                                     | 3.6 (3.1 - 3.8) | 3.0 (2.2 - 3.5) |                                                        | 2.5 (1.3 - 2.8) | 1.2 (1.0 - 2.3) |                                                        | 2.5 (2.0 - 3.0) | 1.6 (1.0 - 2.3) |
| Upper limit – N (%)       |                                                     | 0 (0.0)         | 0 (0.0)         | 0 (0.0)                                                | 0 (0.0)         | 0 (0.0)         | 0 (0.0)                                                | 0 (0.0)         | 0 (0.0)         |
| Lower limit – N (%)       |                                                     | 0 (0.0)         | 1 (12.5)        |                                                        | 1 (12.5)        | 1 (12.5)        |                                                        | 0 (0.0)         | 1 (12.5)        |
| <b>T8: 3-4M_PD4 - N</b>   |                                                     | 11              | 6               |                                                        | 11              | 6               |                                                        | 11              | 6               |
| Median (IQR)              |                                                     | 3.4 (2.9 - 3.6) | 2.3 (2.1 - 2.9) |                                                        | 2.2 (1.0 - 2.4) | 1.3 (1.2 - 1.6) |                                                        | 2.1 (1.6 - 2.7) | 1.2 (0.0 - 1.6) |
| Upper limit – N (%)       |                                                     | 0 (0.0)         | 0 (0.0)         |                                                        | 0 (0.0)         | 0 (0.0)         |                                                        | 0 (0.0)         | 0 (0.0)         |
| Lower limit – N (%)       |                                                     | 0 (0.0)         | 0 (0.0)         |                                                        | 1 (9.1)         | 1 (16.7)        |                                                        | 1 (9.1)         | 2 (33.3)        |

Abbreviations: ID50: 50% inhibitory dose; IMID: Immune-Mediated Inflammatory Diseases; IQR: Inter-quartile range; M: months; PD: Post dose; TNF: Tumor necrosis factor; wks: weeks

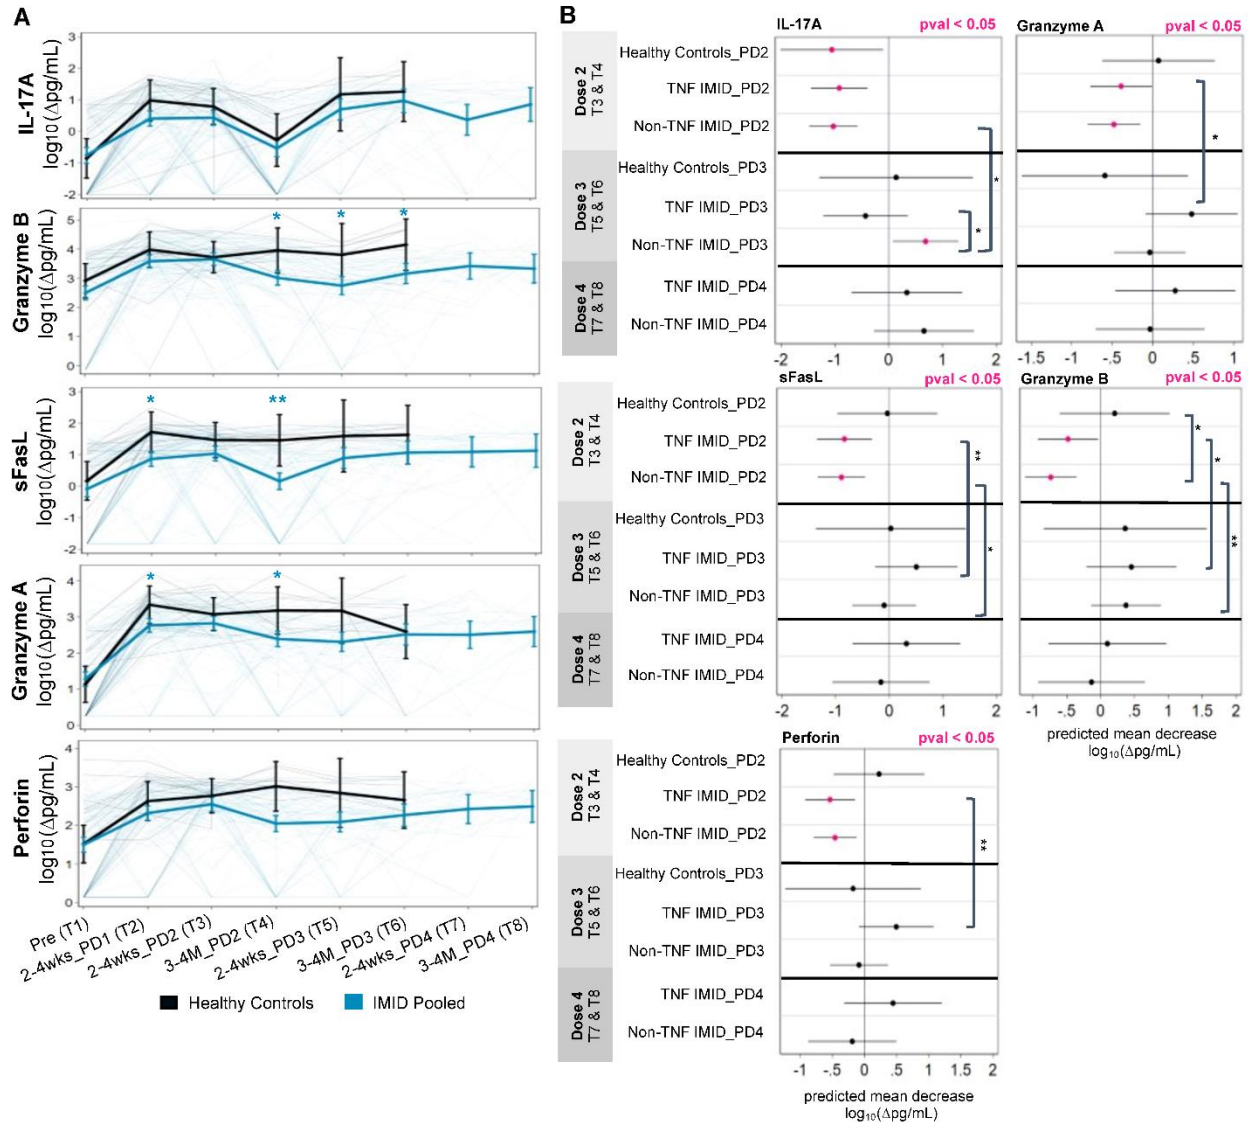

**Supplemental Figure 1. Third and fourth doses increase the magnitude and durability of T cell cytokine and cytotoxic molecule responses.** Timepoints are defined in Table 1. **(A)** Predicted mean T cell cytokines and cytotoxic molecules IL-17A, Granzyme A, Granzyme B, sFasL, Perforin ( $\log_{10}(\Delta\text{pg/mL})$ ) from pre-vaccination to after four doses of vaccine. Mixed-effects linear regression models controlled for age, BMI, and sex (thick colored lines), with an interaction term between timepoint and group. Individual patients are plotted in thin lines. Groupings: healthy controls (black), IMID patients pooled (blue). Mixed-effects linear regression models with an additional control for vaccine type were used to compare IMID pooled vs healthy controls (blue asterisks). **(B)** Predicted mean decrease of cytokine and cytotoxic molecules IL-17A, Granzyme A, Granzyme B, sFasL, and Perforin ( $\log_{10}(\Delta\text{pg/mL})$ ) in healthy controls, TNF IMID, and IMID patients not treated with anti-TNF between 2-4 weeks and 3-4 months after dose 2 (decrease between T3 and T4), after dose 3 (decrease between T5 and T6), and after dose 4 (decrease between T7 and T8). Mixed-effects linear regression models controlled for age, BMI, sex, and vaccine type, with an interaction term between timepoint and group. Mean decrease values that are significant ( $\text{pval} < 0.05$ ) are colored in pink. Significant pairwise comparisons are indicated by asterisks and brackets. **(A-B)** Sample sizes are listed in Supplemental Table 1. \* $\text{p} < 0.05$ ; \*\* $\text{p} < 0.01$ ; \*\*\* $\text{p} < 0.001$ ;  $\Delta$ : background subtracted; pg/mL: picogram per milliliter; PD: post dose
